# Supplementary material for: “Bricks and Clicks”: The Impact of Product Returns on the Strategies of Multichannel Retailers
Source: Atypon-hosted journal article supplement (doi:10.1287/mksc.1100.0588), 2010-07-30
Supplement: mksc.1100.0588-sm-tech_appendix.zip [file figuremulti.pdf › figuremulti.pdf]

**Safer product ( $\beta$ )  
only purchased  
offline**

**Riskier product ( $\alpha$ )  
only purchased  
offline**

No pure  
strategy eq.  
exists

**Safer product ( $\beta$ )  
purchased online and  
offline**

**Riskier product ( $\alpha$ )  
only purchased  
offline**

No pure  
strategy eq.  
exists

**Both products  
purchased online and  
offline**

$0$

$k_1$

$k_2$

$k_3$

$k_4$

$k_H$
